# Supplementary material for: One-dimensional molecular chains formed by Sierpiński triangles on Au(111)
Source: Royal Society of Chemistry journal article supplement (doi:10.1039/c7ra11825b), 2018-01-01
Supplement: c7ra11825b1.pdf [file c7ra11825b1.pdf]

## Electronic Supplementary Information

### One-dimensional molecular chains formed by Sierpiński triangles on Au(111)<sup>†</sup>

Xue Zhang,<sup>a,‡</sup> Gaochen Gu,<sup>a,‡</sup> Na Li,<sup>a</sup> Hao Wang,<sup>a</sup> Hao Tang,<sup>c</sup> Yajie Zhang,<sup>a</sup> Shimin Hou,<sup>a,b</sup> and Yongfeng Wang,<sup>\*a,b</sup>

<sup>a</sup> Key Laboratory for the Physics and Chemistry of Nanodevices, Department of Electronics, Peking University, Beijing 100871, China.

E-mail: yongfengwang@pku.edu.cn

<sup>b</sup> Peking university information technology institute (Tianjin Binhai), Tianjin 300457, China.

<sup>c</sup> Groupe Matériaux Crystallins sous Contrainte, CEMES-CNRS, Boîte Postale 94347, Toulouse 31055, France.

#### DFT calculations

DFT calculations were performed by using the 5.3.3 version of the Vienna Ab initio Simulations Package (VASP) [1,2]. The optB86 functional [3-5] was used to include the van der Waals (vdW) dispersion correction. For all calculations, an energy cut-off of 400 eV was adopted and the criterion of the force convergence of each atom was set as 0.03 eV/Å. The Brillouin zone integration was sampled using only the  $\Gamma$  point. The Au(111) surface is modelled by three atomic layers with the bottom two layers fixed while the atoms in topmost layer were fully relaxed.

Table 1. Adsorption energies of Co-BPyB-Co and Co-C3PC-Co motifs at representative coordinates

|                                | Co-BPyB-Co                                                                          |                                                                                     | Co-C3PC-Co                                                                           |                                                                                       |
|--------------------------------|-------------------------------------------------------------------------------------|-------------------------------------------------------------------------------------|--------------------------------------------------------------------------------------|---------------------------------------------------------------------------------------|
| orientation                    | (4,1)                                                                               | (5,0)                                                                               | (4,3)                                                                                | (6,0)                                                                                 |
| model                          | 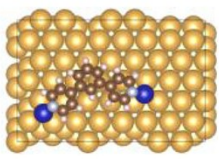 |  |  |  |
| adsorption energy $\Delta E_a$ | -9.2254 eV                                                                          | -8.8410 eV                                                                          | -8.3668 eV                                                                           | -8.4107 eV                                                                            |
| K value                        | 2.4 %                                                                               | 6.5 %                                                                               | 3.7 %                                                                                | 2.3 %                                                                                 |

## References

- [1] G. Kresse and J. Hafner, *Phys. Rev. B*, 1993, **47**, 558–561.
- [2] G. Kresse and J. Furthmüller, *Phys. Rev. B*, 1996, **54**, 11169–11186.
- [3] J. Klimeš, D. R. Bowler and A. Michaelides, *J. Phys.: Cond. Matt.*, 2010, **22**, 022201.
- [4] K. Lee, E. D. Murray, L. Kong, B. I. Lundqvist and D. C. Langreth, *Phys. Rev. B*, 2010, **82**, 081101.
- [5] J. Klimeš, D. R. Bowler and A. Michaelides, *Phys. Rev. B*, 2011, **83**, 195131.
